# Supplementary material
Source: publisher figshare collection journal article supplement (https://karger.figshare.com/articles/dataset/_/4649875)
Supplement: Supplementary file 1 [file 1]

Archive with 14 entries (14 files):
- NEO454668_sm1.doc
- NEO454668_sm2.pdf
- NEO454668_sm3.doc
- NEO454668_sm4.doc
- NEO454668_sm5.docx
- NEO454668_sm6.doc
- NEO454668_sm7.doc
- NEO454668_sm8.pdf
- NEO454668_sm9.pdf
- NEO454668_sm10.pdf
- NEO454668_sm11.pdf
- NEO454668_sm12.pdf
- NEO454668_sm13.pdf
- NEO454668_sm14.pdf
