# Supplementary material
Source: publisher figshare collection journal article supplement (https://karger.figshare.com/articles/dataset/_/4649875)
Supplement: Supplementary file 1 [file 1 › NEO454668_sm8.pdf]

a) Funnel plot of RCT trials

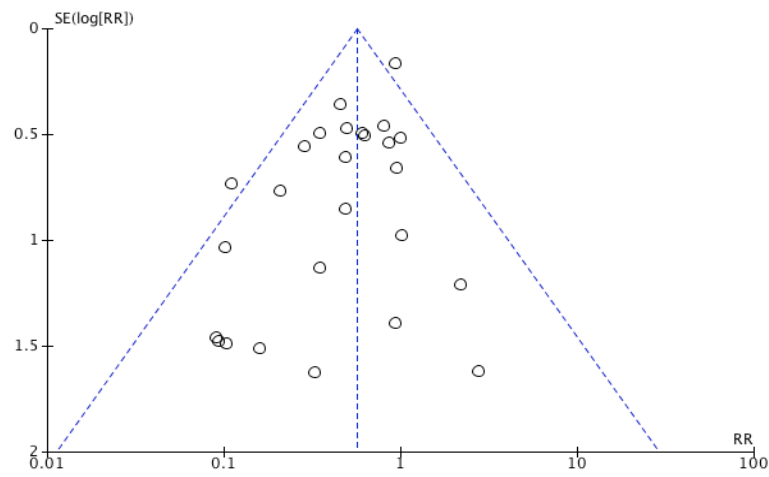

b) Funnel plot of observational trials

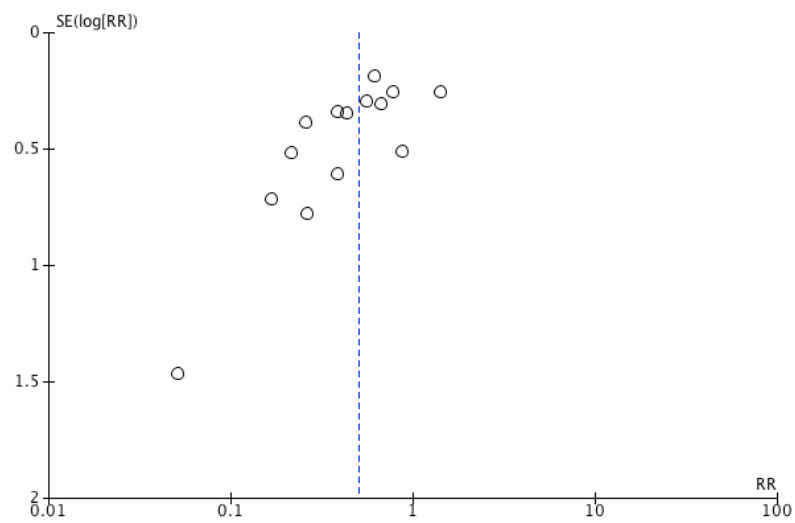

**eFigure 2.** Funnel plot of RCT and observational studies on probiotics and prevention of NEC
