# Supplementary material
Source: publisher figshare collection journal article supplement (https://karger.figshare.com/articles/dataset/_/4649875)
Supplement: Supplementary file 1 [file 1 › NEO454668_sm11.pdf]

## a) ELBW in RCT studies

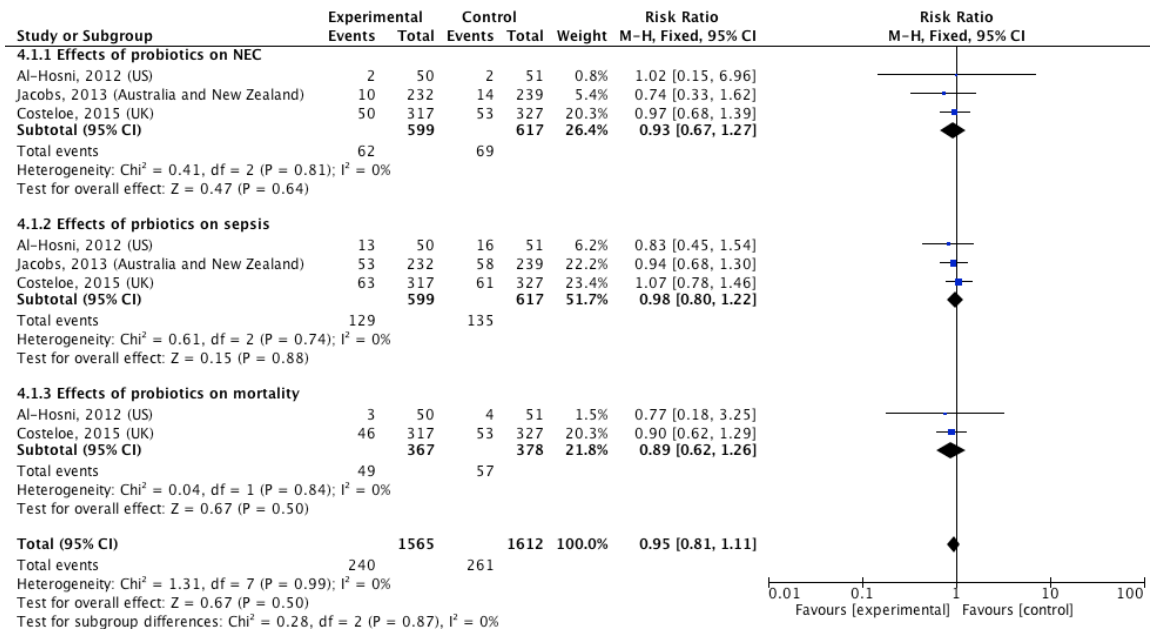

## b) ELBW in observational studies

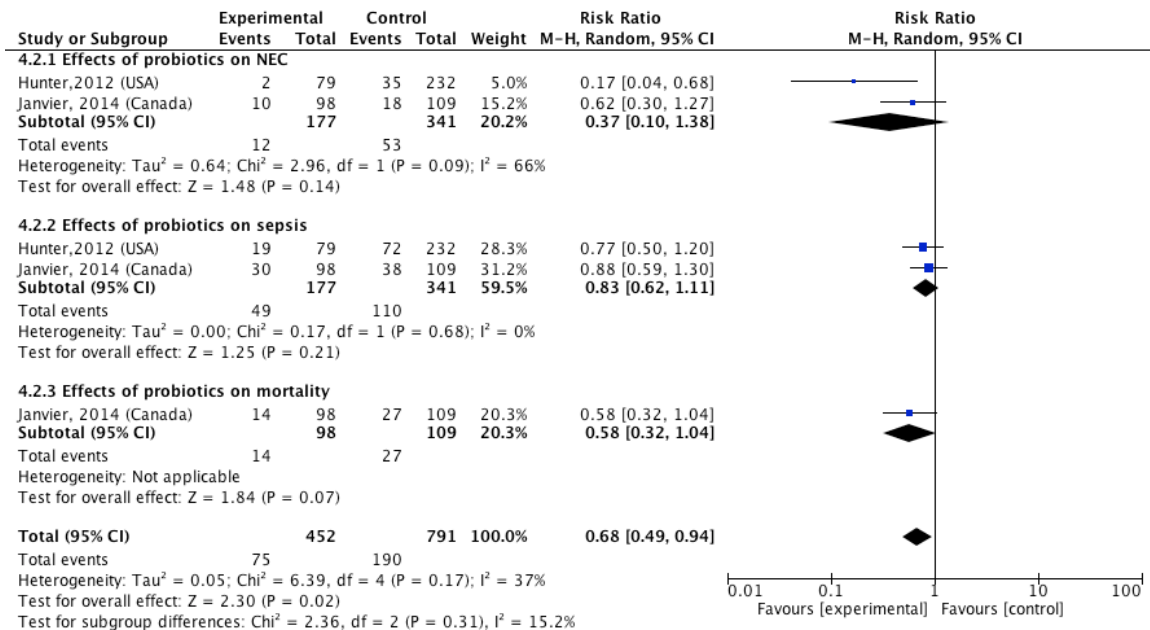

**eFigure 5. Effects of probiotics on NEC, sepsis and mortality in ELBW infants**
