# Supplementary material
Source: publisher figshare collection journal article supplement (https://karger.figshare.com/articles/dataset/_/4649875)
Supplement: Supplementary file 1 [file 1 › NEO454668_sm12.pdf]

# a) NEC in RCT studies

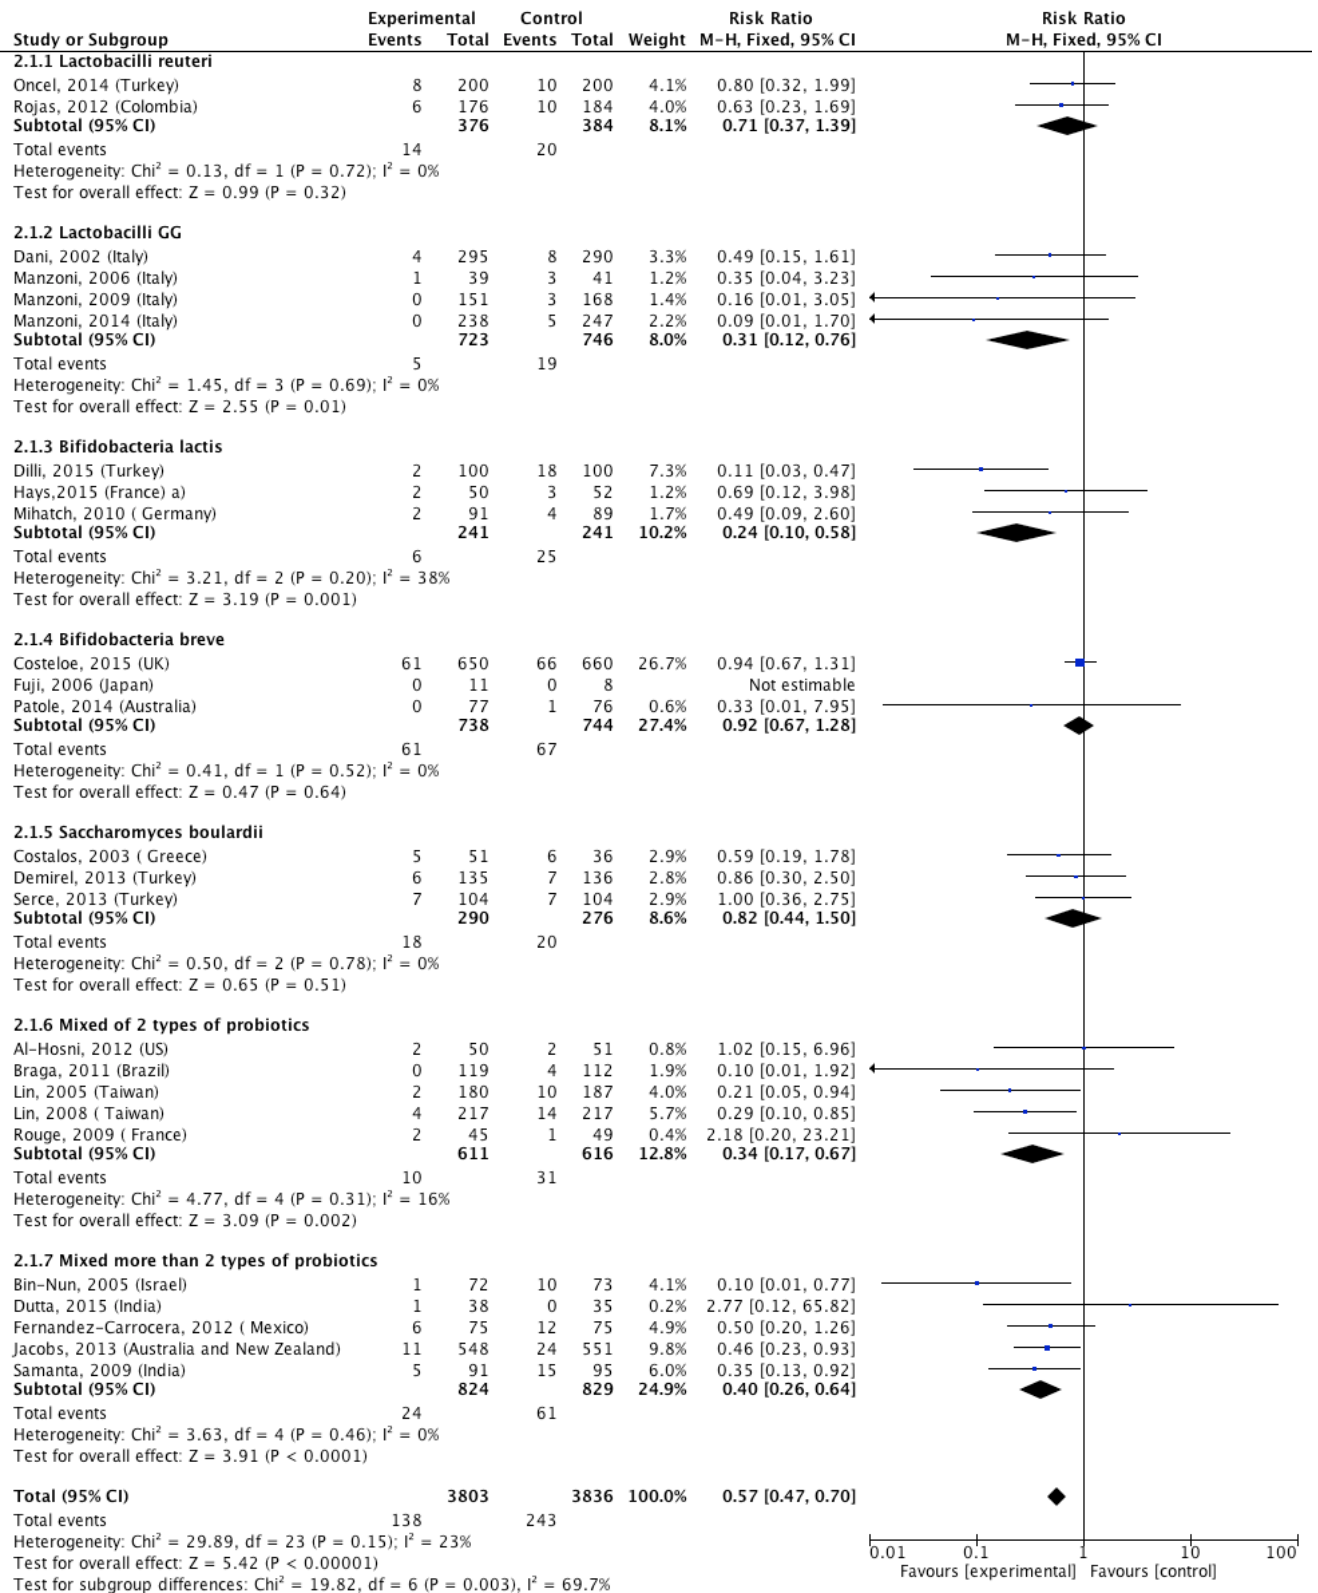

b) NEC in observational studies

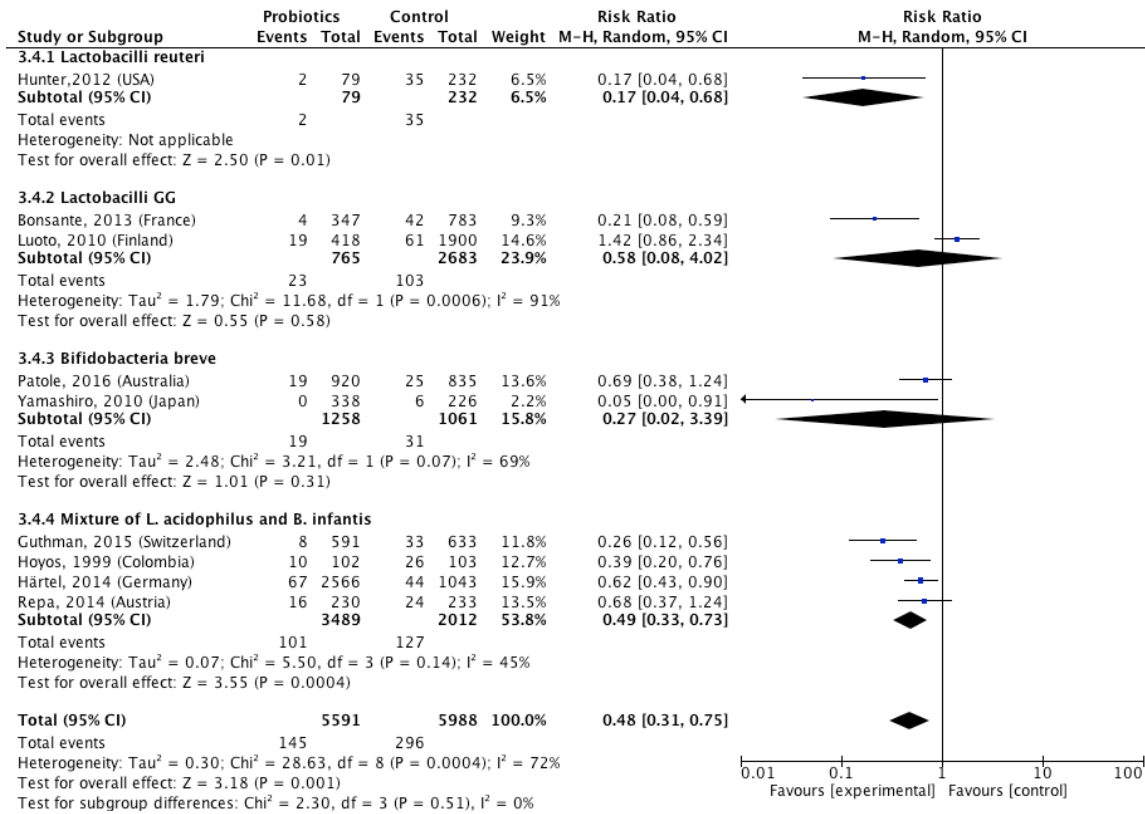

eFigure 6. Effects of single/mixture probiotic strains on severe necrotizing enterocolitis (stage II to III)
