# Supplementary material
Source: publisher figshare collection journal article supplement (https://karger.figshare.com/articles/dataset/_/4649875)
Supplement: Supplementary file 1 [file 1 › NEO454668_sm13.pdf]

## a) Late onset sepsis in RCT studies

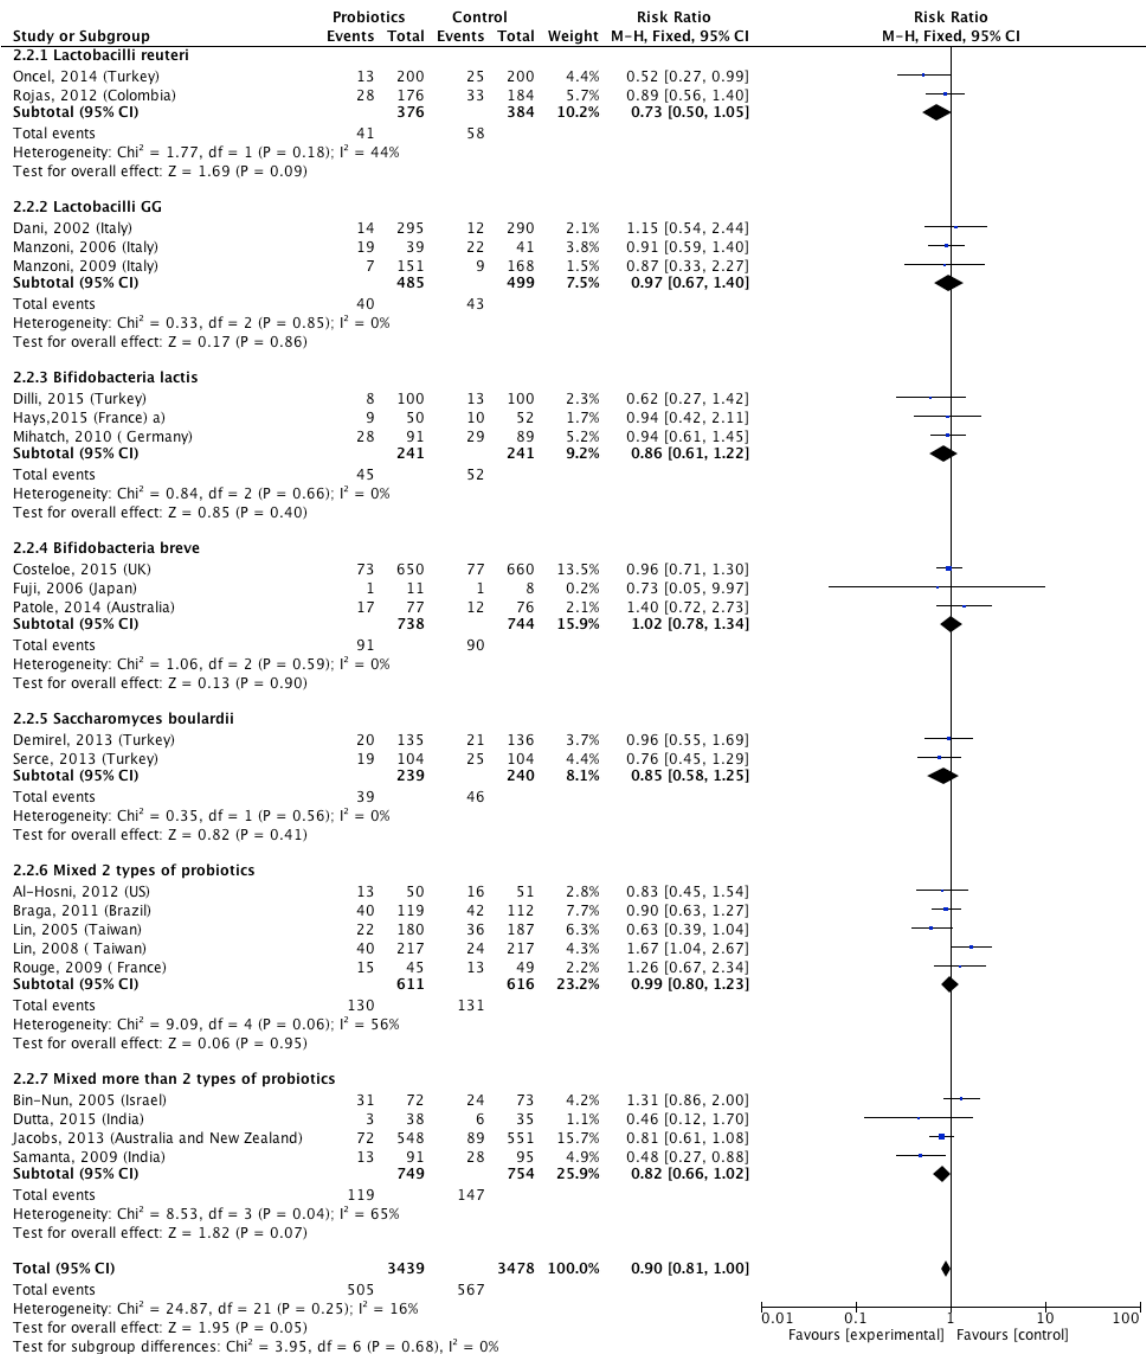

b) Late onset sepsis in observational studies

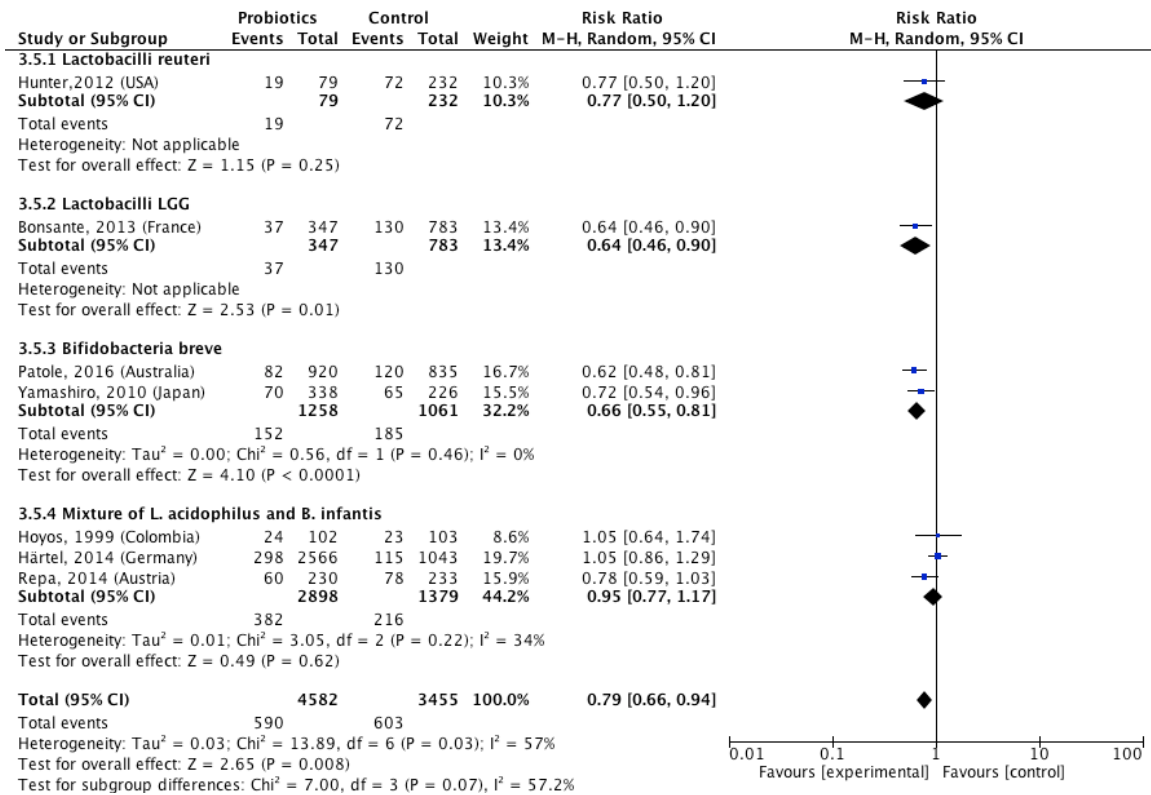

eFigure 7. Effects of single/mixture probiotic strains on late onset sepsis
