# Supplementary material
Source: publisher figshare collection journal article supplement (https://karger.figshare.com/articles/dataset/_/4649875)
Supplement: Supplementary file 1 [file 1 › NEO454668_sm14.pdf]

## a) Mortality in RCT studies

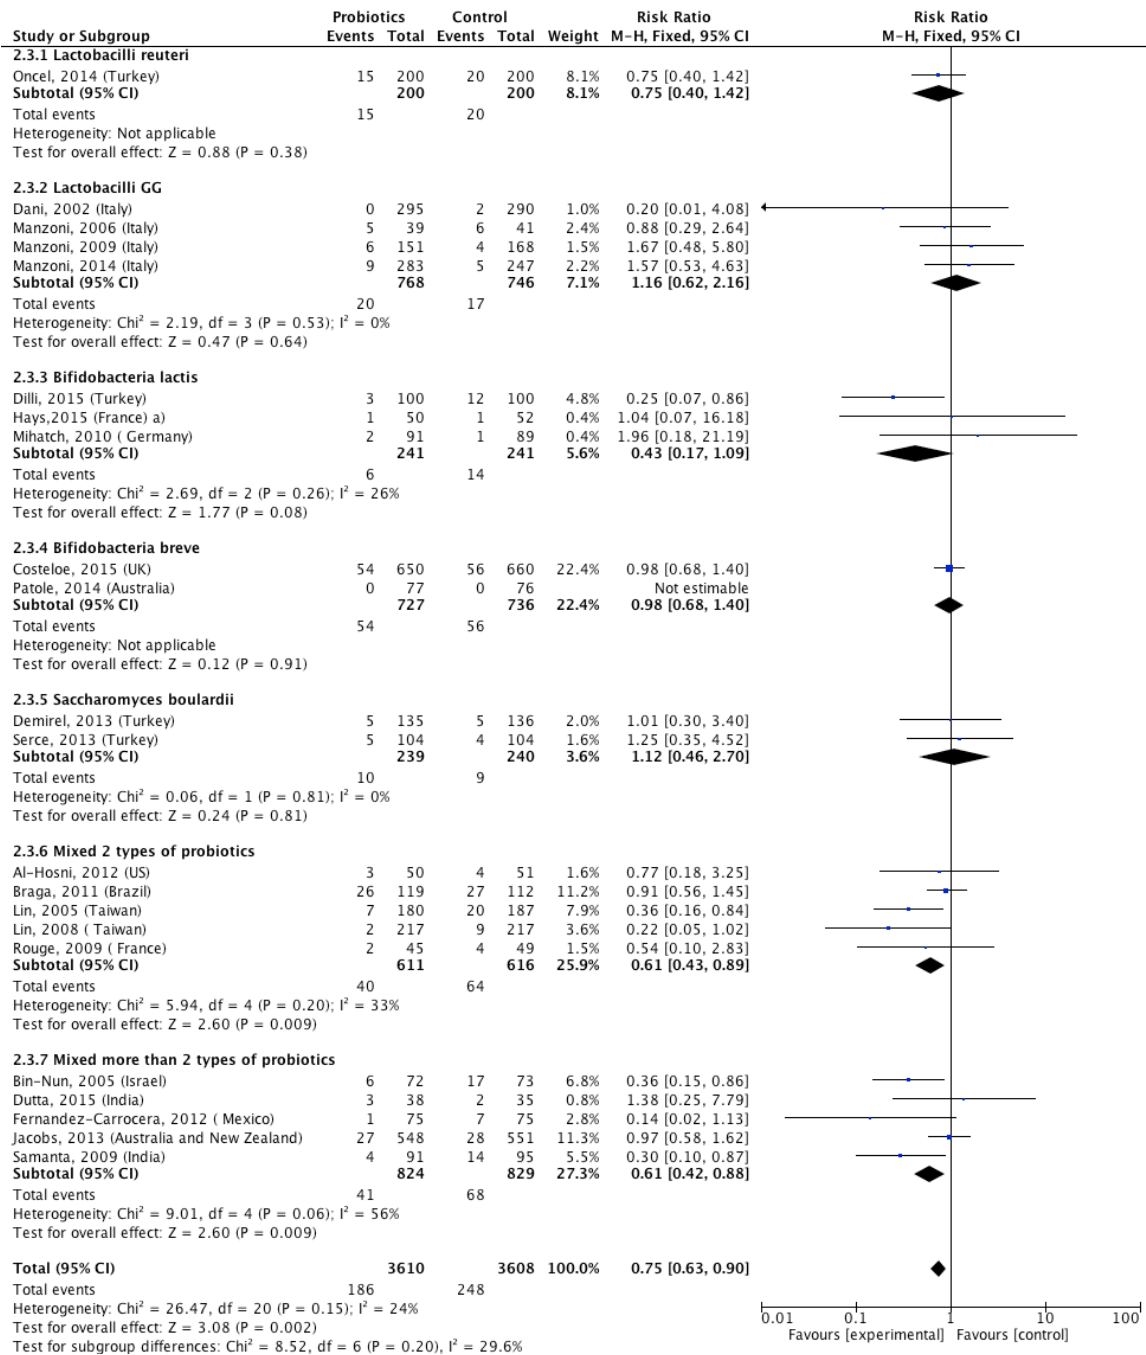

## b) Mortality in observational studies

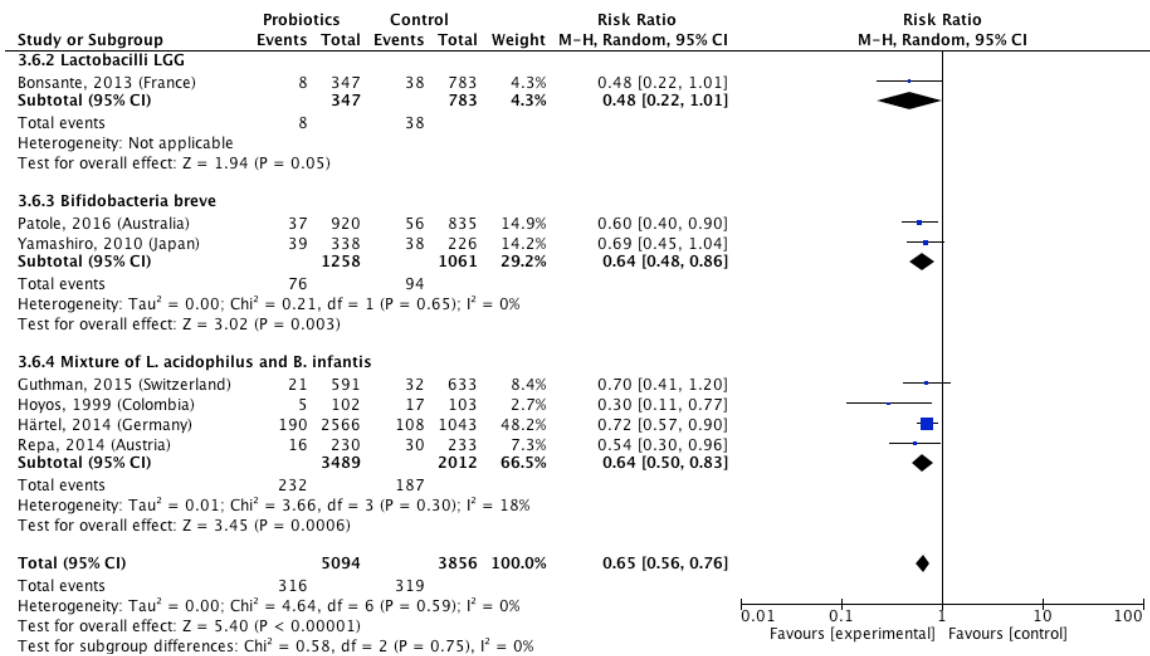

eFigure 8. Effects of single/mixture probiotic strains on mortality
