# Supplementary material
Source: publisher figshare collection journal article supplement (https://karger.figshare.com/articles/dataset/_/4649875)

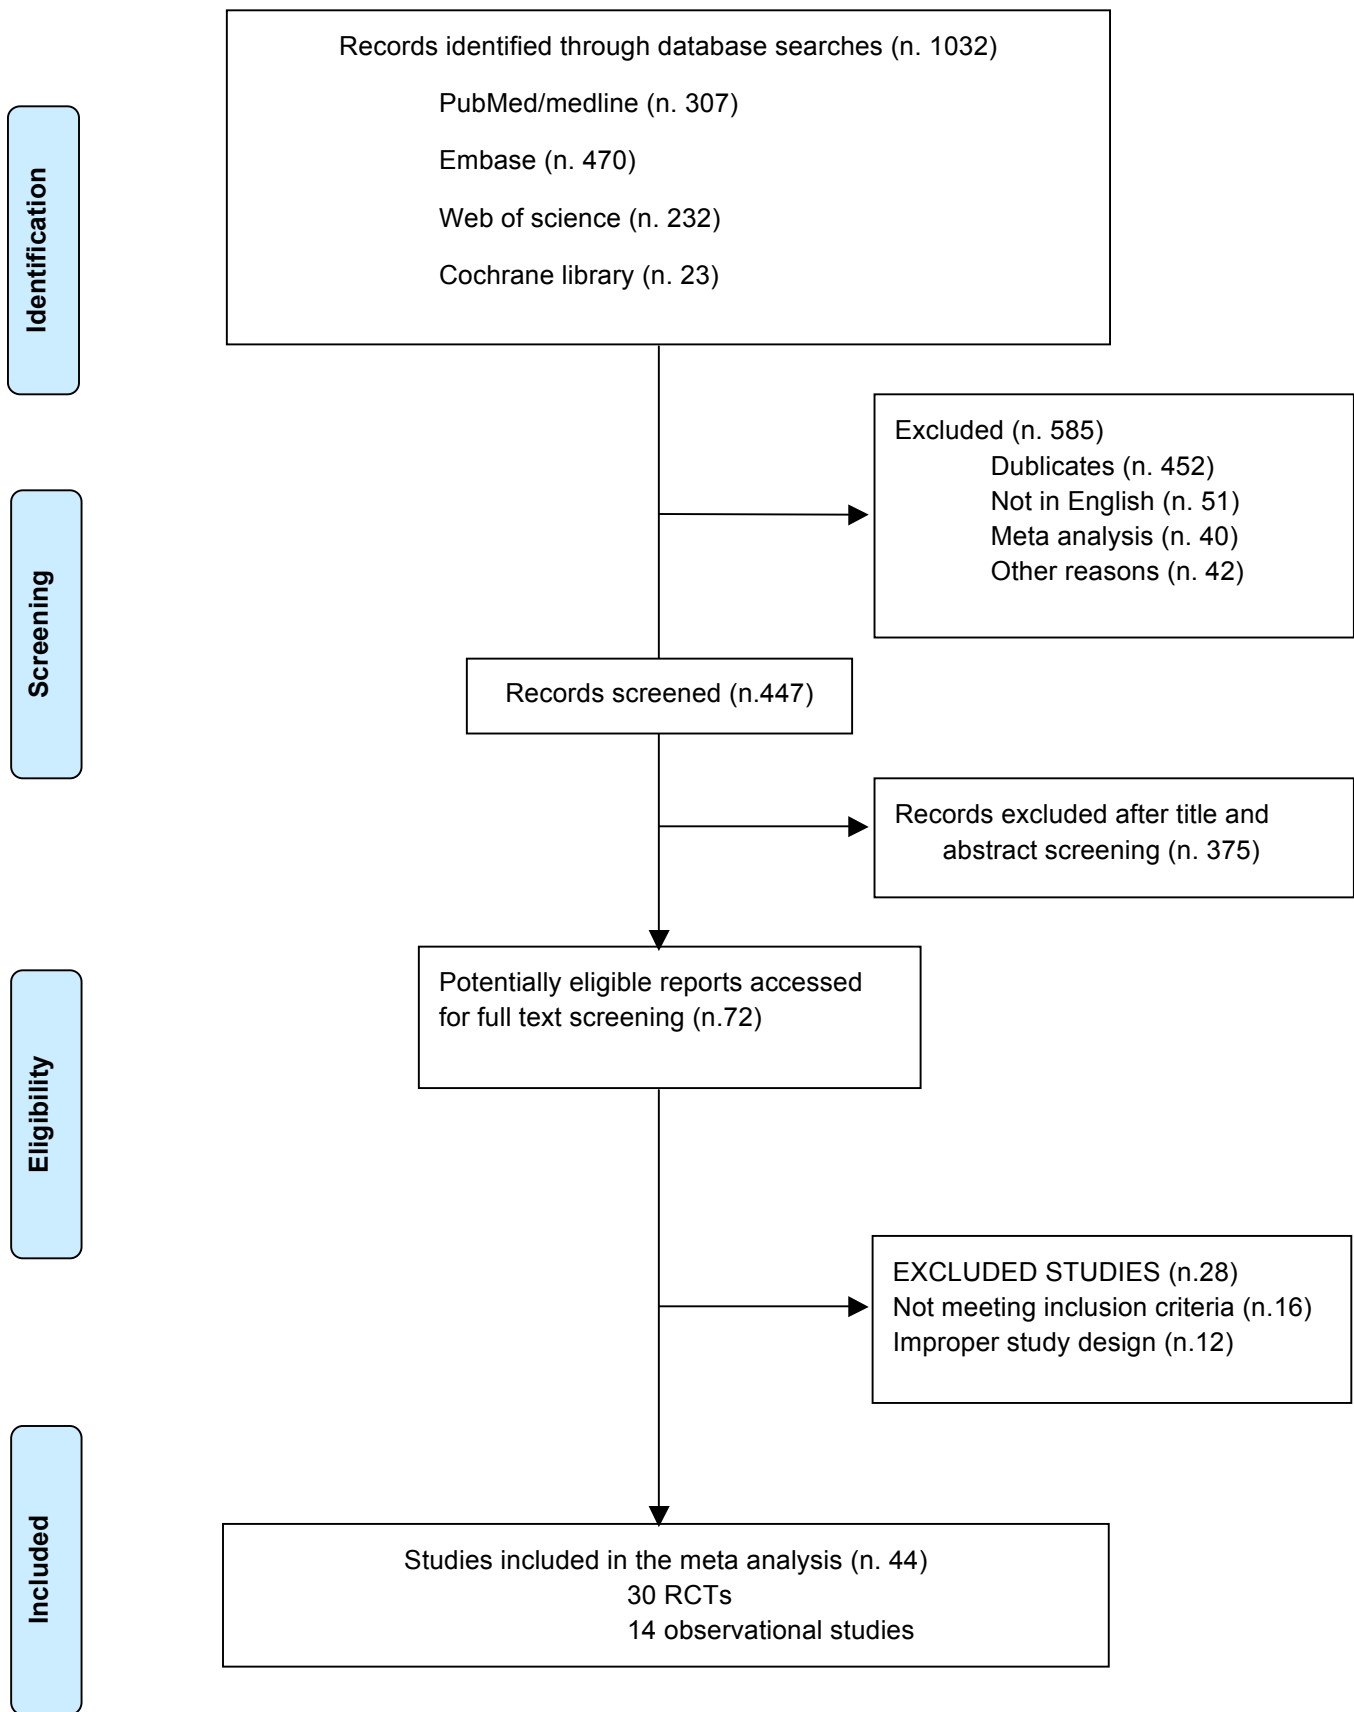

**eFigure 1. Prisma flow diagram**

Supplement: Supplementary file 1 [file 1 › NEO454668_sm2.pdf]
